# Supplementary material for: Marek's disease virus infection of phagocytes: a de novo in vitro infection model
Source: PubMed Central journal article supplement (PMC5656796; doi:10.1099/jgv.0.000763), 2017-05-26
Supplement: jgv-98-1080-s003.pdf [file jgv-98-1080-s003.pdf]

### Supplementary figures

**Figure S1. CEFs infected with EGFP<sup>+</sup>MDV contain cells of the macrophage lineage which are infected with MDV.**

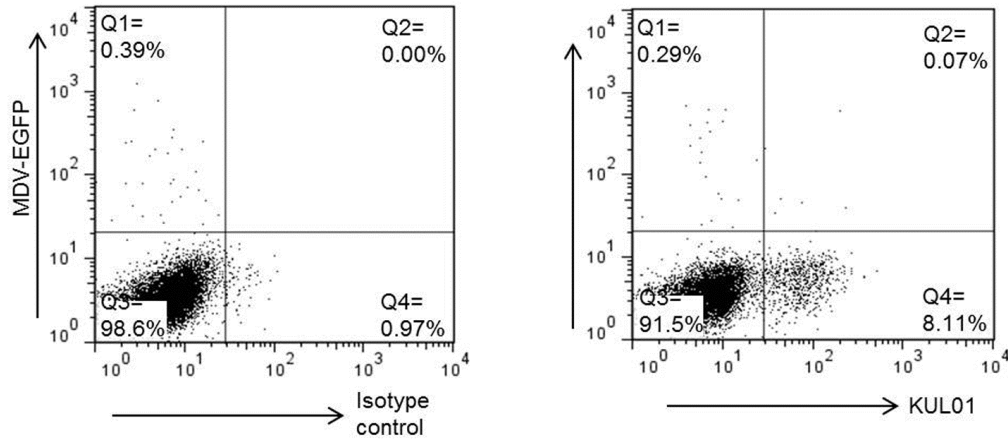

**Figure S2. Analysis of MDV-infected BMM (EGFP<sup>+</sup>CD45<sup>+</sup>) reveals that a single round of sorting does not remove all EGFP<sup>+</sup>CD45<sup>-</sup> CEFs present in the inoculum.**

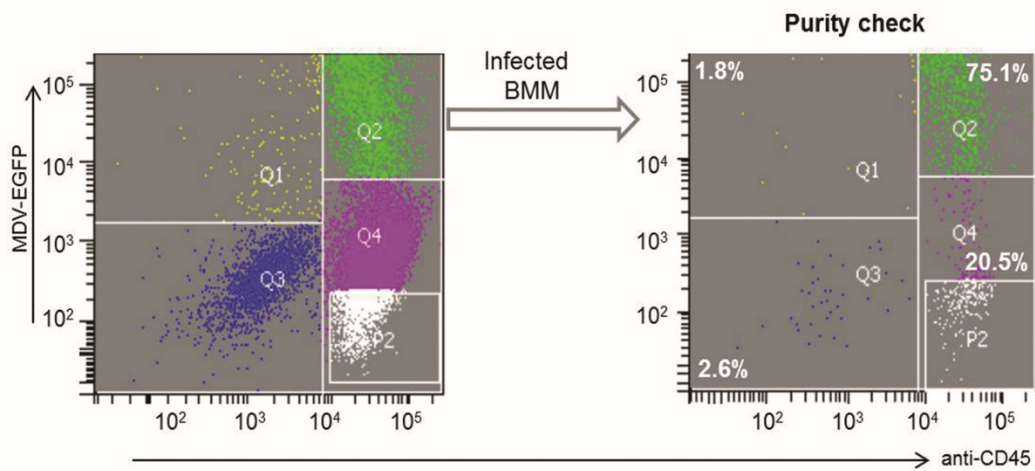

## Supplementary figure legends

**Fig. S1.** Presence of macrophages in CEF cultures and staining pattern of macrophages. (a) CEF cultures naturally contain macrophage-lineage cells. In order to detect macrophage-lineage cells in CEF cultures, previously frozen EGFP expressing MDV-infected CEF were thawed and stained with a mouse monoclonal antibody to chicken macrophages, KUL01 followed by secondary antibody conjugated with AF647. Flow cytometric analysis shows that the CEF culture contains 8% macrophages including a small percentage (0.07%) of EGFP<sup>+</sup>MDV-infected macrophages.

**Fig. S2.** Purity of infected BMM. *In vitro* derived BMM were infected for 3 days with MDV infected CEF expressing EGFP. Virus positive BMM were selected by cell sorting for CD45<sup>+</sup>EGFP<sup>+</sup> cells (left). Sorted cells were reanalysed for the presence of contaminant cells by placing 1000 cells in the same sorting plot (right). Whilst the majority of cells were CD45<sup>+</sup>EGFP<sup>+</sup> (Q2, the sorted population consistently contained around 1-2% infected CEF (Q1) as well as EGFP<sup>-</sup>CEF (Q3) and uninfected BMM (Q4). P2 indicates the sorting zone for uninfected macrophage.
